# Supplementary material for: Mandipropamid as a chemical inducer of proximity for in vivo applications
Source: Nat Chem Biol. 2021 Dec 21;18(1):64–9. doi: 10.1038/s41589-021-00922-3 (PMC8709788; doi:10.1038/s41589-021-00922-3)
Supplement: Supplementary file 7 [file 41589_2021_922_MOESM1_ESM.mol]

nchembio.A200911999A-comp1.mol
  ChemDraw10112114412D

 29 30  0  0  0  0  0  0  0  0999 V2000
   -4.6437   -0.8250    0.0000 C   0  0  0  0  0  0  0  0  0  0  0  0
   -4.6437   -1.6500    0.0000 C   0  0  0  0  0  0  0  0  0  0  0  0
   -3.9294   -2.0625    0.0000 C   0  0  0  0  0  0  0  0  0  0  0  0
   -3.2152   -1.6500    0.0000 C   0  0  0  0  0  0  0  0  0  0  0  0
   -3.2152   -0.8250    0.0000 C   0  0  0  0  0  0  0  0  0  0  0  0
   -3.9294   -0.4125    0.0000 C   0  0  0  0  0  0  0  0  0  0  0  0
   -5.3587   -2.0625    0.0000 Cl  0  0  0  0  0  0  0  0  0  0  0  0
   -2.5002   -0.4125    0.0000 C   0  0  0  0  0  0  0  0  0  0  0  0
   -1.7860   -0.8250    0.0000 C   0  0  0  0  0  0  0  0  0  0  0  0
   -2.5002    0.4125    0.0000 O   0  0  0  0  0  0  0  0  0  0  0  0
   -3.2152    0.8250    0.0000 C   0  0  0  0  0  0  0  0  0  0  0  0
   -3.2152    1.6500    0.0000 C   0  0  0  0  0  0  0  0  0  0  0  0
   -3.2152    2.4750    0.0000 C   0  0  0  0  0  0  0  0  0  0  0  0
   -1.0717   -0.4125    0.0000 N   0  0  0  0  0  0  0  0  0  0  0  0
   -1.7860   -1.6500    0.0000 O   0  0  0  0  0  0  0  0  0  0  0  0
   -0.3575   -0.8250    0.0000 C   0  0  0  0  0  0  0  0  0  0  0  0
    0.3575   -0.4125    0.0000 C   0  0  0  0  0  0  0  0  0  0  0  0
    1.0717   -0.8250    0.0000 C   0  0  0  0  0  0  0  0  0  0  0  0
    1.0717   -1.6500    0.0000 C   0  0  0  0  0  0  0  0  0  0  0  0
    1.7860   -2.0625    0.0000 C   0  0  0  0  0  0  0  0  0  0  0  0
    2.5010   -1.6500    0.0000 C   0  0  0  0  0  0  0  0  0  0  0  0
    2.5010   -0.8250    0.0000 C   0  0  0  0  0  0  0  0  0  0  0  0
    1.7860   -0.4125    0.0000 C   0  0  0  0  0  0  0  0  0  0  0  0
    3.2152   -2.0625    0.0000 O   0  0  0  0  0  0  0  0  0  0  0  0
    3.9294   -1.6500    0.0000 C   0  0  0  0  0  0  0  0  0  0  0  0
    4.6444   -2.0625    0.0000 C   0  0  0  0  0  0  0  0  0  0  0  0
    3.2152   -0.4125    0.0000 O   0  0  0  0  0  0  0  0  0  0  0  0
    3.9294   -0.8250    0.0000 C   0  0  0  0  0  0  0  0  0  0  0  0
    5.3587   -2.4750    0.0000 C   0  0  0  0  0  0  0  0  0  0  0  0
  1  2  2  0      
  2  3  1  0      
  3  4  2  0      
  4  5  1  0      
  5  6  2  0      
  6  1  1  0      
  2  7  1  0      
  5  8  1  0      
  8  9  1  0      
  8 10  1  0      
 10 11  1  0      
 11 12  1  0      
 12 13  3  0      
  9 14  1  0      
  9 15  2  0      
 14 16  1  0      
 16 17  1  0      
 17 18  1  0      
 18 19  2  0      
 19 20  1  0      
 20 21  2  0      
 21 22  1  0      
 22 23  2  0      
 23 18  1  0      
 21 24  1  0      
 24 25  1  0      
 25 26  1  0      
 22 27  1  0      
 27 28  1  0      
 26 29  3  0      
M  END
