# Supplementary material for: Mandipropamid as a chemical inducer of proximity for in vivo applications
Source: Nat Chem Biol. 2021 Dec 21;18(1):64–9. doi: 10.1038/s41589-021-00922-3 (PMC8709788; doi:10.1038/s41589-021-00922-3)
Supplement: Supplementary file 15 [file 41589_2021_922_MOESM9_ESM.mol]

nchembio.A200911999A-comp5.mol
  ChemDraw10112114412D

 65 68  0  0  1  0  0  0  0  0999 V2000
   -3.2152    3.9193    0.0000 C   0  0  0  0  0  0  0  0  0  0  0  0
   -3.2152    3.0941    0.0000 C   0  0  0  0  0  0  0  0  0  0  0  0
   -2.5008    2.6815    0.0000 C   0  0  0  0  0  0  0  0  0  0  0  0
   -1.7864    3.0941    0.0000 C   0  0  0  0  0  0  0  0  0  0  0  0
   -1.7864    3.9193    0.0000 C   0  0  0  0  0  0  0  0  0  0  0  0
   -2.5008    4.3319    0.0000 C   0  0  0  0  0  0  0  0  0  0  0  0
   -3.9304    4.3319    0.0000 O   0  0  0  0  0  0  0  0  0  0  0  0
   -3.9304    2.6815    0.0000 O   0  0  0  0  0  0  0  0  0  0  0  0
   -1.0720    2.6815    0.0000 C   0  0  0  0  0  0  0  0  0  0  0  0
   -1.0720    1.8563    0.0000 C   0  0  0  0  0  0  0  0  0  0  0  0
   -0.3576    1.4437    0.0000 C   0  0  0  0  0  0  0  0  0  0  0  0
   -1.0720    1.0311    0.0000 C   0  0  0  0  0  0  0  0  0  0  0  0
   -0.3576    0.6185    0.0000 O   0  0  0  0  0  0  0  0  0  0  0  0
    0.3576    1.8563    0.0000 C   0  0  0  0  0  0  0  0  0  0  0  0
    1.0720    1.4437    0.0000 C   0  0  0  0  0  0  0  0  0  0  0  0
    1.0720    0.6185    0.0000 O   0  0  0  0  0  0  0  0  0  0  0  0
    1.7864    1.8563    0.0000 C   0  0  0  0  0  0  0  0  0  0  0  0
    1.7864    2.6815    0.0000 C   0  0  0  0  0  0  0  0  0  0  0  0
    2.5008    1.4437    0.0000 C   0  0  0  0  0  0  0  0  0  0  0  0
    2.5008    0.6185    0.0000 C   0  0  0  0  0  0  0  0  0  0  0  0
    1.7864    0.2059    0.0000 C   0  0  0  0  0  0  0  0  0  0  0  0
    3.2152    0.2059    0.0000 C   0  0  0  0  0  0  0  0  0  0  0  0
    3.2152   -0.6193    0.0000 C   0  0  0  0  0  0  0  0  0  0  0  0
    3.9304    0.6185    0.0000 O   0  0  0  0  0  0  0  0  0  0  0  0
    2.5008   -1.0311    0.0000 O   0  0  0  0  0  0  0  0  0  0  0  0
    3.9304   -1.0311    0.0000 C   0  0  0  0  0  0  0  0  0  0  0  0
    3.9304   -1.8563    0.0000 C   0  0  0  0  0  0  0  0  0  0  0  0
    4.6448   -0.6193    0.0000 O   0  0  0  0  0  0  0  0  0  0  0  0
    3.2152   -2.2689    0.0000 C   0  0  0  0  0  0  0  0  0  0  0  0
   -1.0720    0.2059    0.0000 C   0  0  0  0  0  0  0  0  0  0  0  0
   -1.0720   -0.6193    0.0000 O   0  0  0  0  0  0  0  0  0  0  0  0
   -1.7864    0.6185    0.0000 C   0  0  0  0  0  0  0  0  0  0  0  0
   -1.7864    1.4437    0.0000 C   0  0  0  0  0  0  0  0  0  0  0  0
   -2.5008    1.8563    0.0000 C   0  0  0  0  0  0  0  0  0  0  0  0
   -3.2152    1.4437    0.0000 C   0  0  0  0  0  0  0  0  0  0  0  0
   -3.2152    0.6185    0.0000 C   0  0  0  0  0  0  0  0  0  0  0  0
   -2.5008    0.2059    0.0000 N   0  0  0  0  0  0  0  0  0  0  0  0
   -2.5008   -0.6193    0.0000 C   0  0  0  0  0  0  0  0  0  0  0  0
   -1.7864   -1.0311    0.0000 O   0  0  0  0  0  0  0  0  0  0  0  0
   -3.2152   -1.0311    0.0000 C   0  0  0  0  0  0  0  0  0  0  0  0
   -3.9304   -0.6193    0.0000 O   0  0  0  0  0  0  0  0  0  0  0  0
   -3.2152   -1.8563    0.0000 C   0  0  0  0  0  0  0  0  0  0  0  0
   -2.5008   -2.2689    0.0000 O   0  0  0  0  0  0  0  0  0  0  0  0
   -3.9304   -2.2689    0.0000 C   0  0  0  0  0  0  0  0  0  0  0  0
   -3.9304   -1.4437    0.0000 O   0  0  0  0  0  0  0  0  0  0  0  0
   -3.9304   -3.0941    0.0000 C   0  0  0  0  0  0  0  0  0  0  0  0
   -3.2152   -3.5067    0.0000 C   0  0  0  0  0  0  0  0  0  0  0  0
   -2.5008   -3.0941    0.0000 C   0  0  0  0  0  0  0  0  0  0  0  0
   -4.6448   -1.8563    0.0000 C   0  0  0  0  0  0  0  0  0  0  0  0
   -1.7864   -3.5067    0.0000 C   0  0  0  0  0  0  0  0  0  0  0  0
   -1.0720   -3.0941    0.0000 C   0  0  0  0  0  0  0  0  0  0  0  0
   -0.3576   -3.5067    0.0000 C   0  0  0  0  0  0  0  0  0  0  0  0
   -1.0720   -2.2689    0.0000 O   0  0  0  0  0  0  0  0  0  0  0  0
   -0.3576   -4.3319    0.0000 C   0  0  0  0  0  0  0  0  0  0  0  0
    0.3576   -3.0941    0.0000 C   0  0  0  0  0  0  0  0  0  0  0  0
    1.0720   -3.5067    0.0000 C   0  0  0  0  0  0  0  0  0  0  0  0
    1.7864   -3.0941    0.0000 C   0  0  0  0  0  0  0  0  0  0  0  0
    2.5008   -3.5067    0.0000 C   0  0  0  0  0  0  0  0  0  0  0  0
    3.2152   -3.0941    0.0000 C   0  0  0  0  0  0  0  0  0  0  0  0
    3.9021   -3.3264    0.0000 C   0  0  0  0  0  0  0  0  0  0  0  0
    4.5134   -2.4401    0.0000 C   0  0  0  0  0  0  0  0  0  0  0  0
    4.1619   -4.1096    0.0000 C   0  0  0  0  0  0  0  0  0  0  0  0
   -0.3576   -1.8563    0.0000 C   0  0  0  0  0  0  0  0  0  0  0  0
    1.7864   -0.6193    0.0000 C   0  0  0  0  0  0  0  0  0  0  0  0
   -4.6448    3.0941    0.0000 C   0  0  0  0  0  0  0  0  0  0  0  0
  1  2  1  0      
  2  3  1  0      
  3  4  1  0      
  4  5  1  0      
  5  6  1  0      
  6  1  1  0      
  1  7  1  6      
  2  8  1  1      
  4  9  1  1      
  9 10  1  0      
 10 11  1  0      
 10 12  1  6      
 11 13  1  6      
 11 14  1  0      
 14 15  1  0      
 15 16  2  0      
 15 17  1  0      
 17 18  1  6      
 17 19  1  0      
 19 20  2  0      
 20 21  1  0      
 20 22  1  0      
 22 23  1  0      
 22 24  1  1      
 23 25  1  6      
 23 26  1  0      
 26 27  1  0      
 26 28  2  0      
 27 29  1  1      
 13 30  1  0      
 30 31  2  0      
 32 33  1  0      
 33 34  1  0      
 34 35  1  0      
 35 36  1  0      
 36 37  1  0      
 37 32  1  0      
 37 38  1  0      
 38 39  2  0      
 38 40  1  0      
 40 41  2  0      
 40 42  1  0      
 42 43  1  0      
 42 44  1  0      
 42 45  1  1      
 44 46  1  0      
 46 47  1  0      
 47 48  1  0      
 44 49  1  1      
 48 50  1  0      
 50 51  1  0      
 51 52  1  0      
 51 53  1  6      
 52 54  1  0      
 52 55  2  0      
 55 56  1  0      
 56 57  2  0      
 57 58  1  0      
 58 59  2  0      
 59 60  1  0      
 27 61  1  0      
 60 61  1  0      
 60 62  1  6      
 48 43  1  6      
 32 30  1  1      
 53 63  1  0      
 25 64  1  0      
  8 65  1  0      
M  END
