# Supplementary material for: Mandipropamid as a chemical inducer of proximity for in vivo applications
Source: Nat Chem Biol. 2021 Dec 21;18(1):64–9. doi: 10.1038/s41589-021-00922-3 (PMC8709788; doi:10.1038/s41589-021-00922-3)
Supplement: Supplementary file 19 [file 41589_2021_922_MOESM13_ESM.mol]

41589_2021_922_MOESM13_ESM.mol
  ChemDraw12172114592D

 29 30  0  0  1  0  0  0  0  0999 V2000
   -1.4288   -1.4437    0.0000 C   0  0  0  0  0  0  0  0  0  0  0  0
   -1.4288   -2.2689    0.0000 C   0  0  0  0  0  0  0  0  0  0  0  0
   -0.7144   -2.6815    0.0000 C   0  0  0  0  0  0  0  0  0  0  0  0
    0.0000   -2.2689    0.0000 C   0  0  0  0  0  0  0  0  0  0  0  0
    0.0000   -1.4437    0.0000 C   0  0  0  0  0  0  0  0  0  0  0  0
   -0.7144   -1.0311    0.0000 C   0  0  0  0  0  0  0  0  0  0  0  0
   -0.7144   -0.2059    0.0000 C   0  0  0  0  0  0  0  0  0  0  0  0
    0.0000   -0.6185    0.0000 C   0  0  0  0  0  0  0  0  0  0  0  0
    0.7152   -2.6815    0.0000 C   0  0  0  0  0  0  0  0  0  0  0  0
    0.7152   -1.8563    0.0000 C   0  0  0  0  0  0  0  0  0  0  0  0
    0.7152   -1.0311    0.0000 O   0  0  0  0  0  0  0  0  0  0  0  0
    1.4296   -1.4437    0.0000 C   0  0  0  0  0  0  0  0  0  0  0  0
    2.1440   -1.8563    0.0000 C   0  0  0  0  0  0  0  0  0  0  0  0
    2.8584   -1.4437    0.0000 C   0  0  0  0  0  0  0  0  0  0  0  0
    2.8584   -0.6185    0.0000 C   0  0  0  0  0  0  0  0  0  0  0  0
    2.1440   -2.6815    0.0000 C   0  0  0  0  0  0  0  0  0  0  0  0
    3.5728   -0.2059    0.0000 O   0  0  0  0  0  0  0  0  0  0  0  0
    2.1440   -0.2059    0.0000 O   0  0  0  0  0  0  0  0  0  0  0  0
   -2.1432   -2.6815    0.0000 O   0  0  0  0  0  0  0  0  0  0  0  0
   -2.1432    0.6193    0.0000 C   0  0  0  0  0  0  0  0  0  0  0  0
   -2.1432    1.4437    0.0000 C   0  0  0  0  0  0  0  0  0  0  0  0
   -2.8576    1.8563    0.0000 C   0  0  0  0  0  0  0  0  0  0  0  0
   -3.5728    1.4437    0.0000 C   0  0  0  0  0  0  0  0  0  0  0  0
   -3.5728    0.6193    0.0000 C   0  0  0  0  0  0  0  0  0  0  0  0
   -2.8576    0.2067    0.0000 C   0  0  0  0  0  0  0  0  0  0  0  0
   -2.8576   -0.6185    0.0000 C   0  0  0  0  0  0  0  0  0  0  0  0
   -2.8576   -1.4437    0.0000 C   0  0  0  0  0  0  0  0  0  0  0  0
   -2.8576   -2.2689    0.0000 C   0  0  0  0  0  0  0  0  0  0  0  0
   -2.8576    2.6815    0.0000 C   0  0  0  0  0  0  0  0  0  0  0  0
  1  2  1  0      
  2  3  1  0      
  3  4  2  0      
  4  5  1  0      
  5  6  1  0      
  6  1  1  0      
  6  7  1  0      
  6  8  1  0      
  4  9  1  0      
  5 10  1  1      
  5 11  1  6      
 10 12  2  0      
 12 13  1  0      
 13 14  2  0      
 14 15  1  0      
 13 16  1  0      
 15 17  1  0      
 15 18  2  0      
  2 19  1  6      
 20 25  1  0      
 19 28  1  0      
 21 20  2  0      
 22 21  1  0      
 23 22  2  0      
 24 23  1  0      
 25 24  2  0      
 26 25  1  0      
 27 26  3  0      
 28 27  1  0      
 22 29  1  0      
M  END
